# Supplementary material for: The small intestine epithelium exempts Foxp3+ Tregs from their IL-2 requirement for homeostasis and effector function
Source: JCI journal article supplement (doi:10.1172/jci.insight.149656), 2021-11-07
Supplement: sd1 [file 1]

# Supplementary Figure 1

**A**

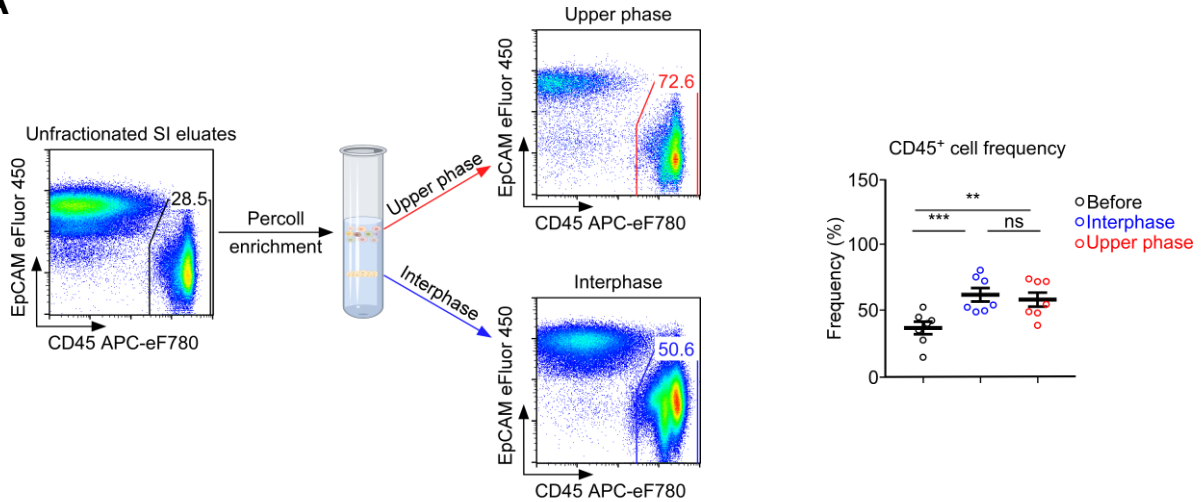

**B**

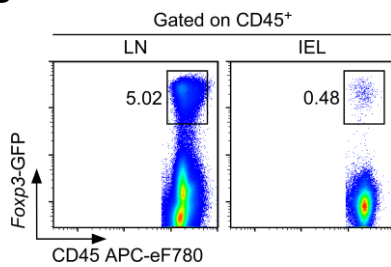

**C**

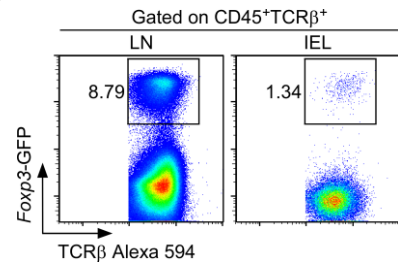

## Suppl. Fig. 1 Percoll gradient method and *Foxp3*<sup>+</sup> Treg cell frequencies among CD45<sup>+</sup> IELs

**A.** EpCAM versus CD45 profile of SI IEL before Percoll enrichment (left), and for upper phase and interphase phases after Percoll enrichment (middle). Graph shows the CD45<sup>+</sup> cell frequency as a summary of 3 independent experiments with a total of 7 WT mice (right).

**B.** Frequency of *Foxp3*<sup>+</sup> Treg cells was determined among CD45<sup>+</sup> LN cells and SI IEL that were enriched by the conventional Percoll gradient method from *Foxp3*-GFP reporter mice. Result is representative of 2 independent experiments with a total of 4 *Foxp3*-GFP reporter mice.

**C.** Frequency of *Foxp3*<sup>+</sup> Treg cells was determined among CD45<sup>+</sup>TCRβ<sup>+</sup> LN cells and SI IELs that were enriched by the conventional Percoll gradient method from *Foxp3*-GFP reporter mice. Result is representative of 2 independent experiments with a total of 4 *Foxp3*-GFP reporter mice. Data are represented as mean ± SEM. *P* values were determined by one-way ANOVA with Tukey's multiple comparison test. \*\*, *P* < 0.01; \*\*\*, *P* < 0.001; ns, non-significant.

# Supplementary Figure 2

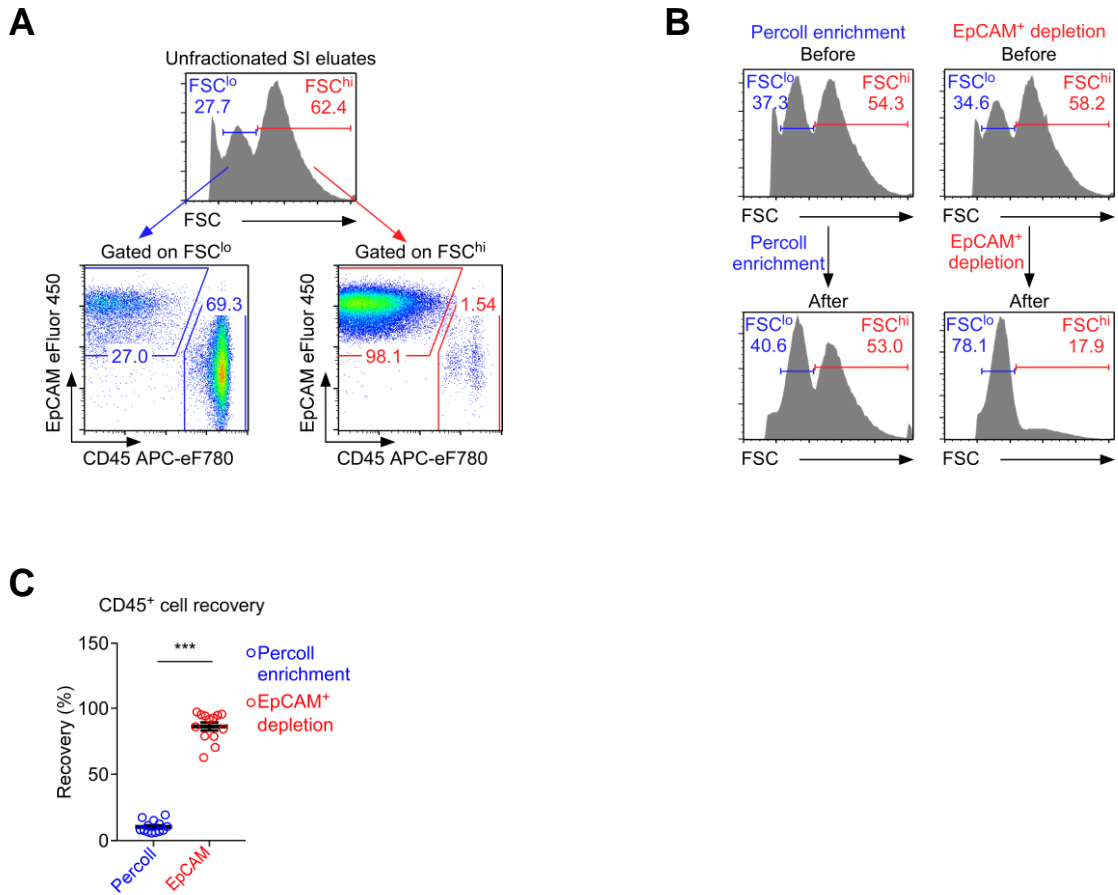

## Suppl. Fig. 2 IEL isolation by EpCAM<sup>+</sup> cell depletion

**A.** Forward scatter (FSC) analysis of SI IELs. FSC<sup>lo</sup> and FSC<sup>hi</sup> cells were assessed for EpCAM and CD45 expression. The EpCAM<sup>+</sup>CD45<sup>-</sup> gate corresponds to epithelial cells, while the EpCAM<sup>-</sup>CD45<sup>+</sup> gate identifies cells of hematopoietic origin. The data are representative of 9 independent experiments with a total of 13 WT mice.

**B.** Forward scatter (FSC) analysis of SI IEL before and after Percoll enrichment (left) or EpCAM<sup>+</sup> depletion (right). The results are representative of 9 experiments.

**C.** Recovery of CD45<sup>+</sup> SI IELs from WT mice after Percoll enrichment or EpCAM<sup>+</sup> cell depletion. The percentage recovery was determined by dividing the number of CD45<sup>+</sup> cells after EpCAM<sup>+</sup> depletion by the number of CD45<sup>+</sup> cells in the SI epithelial lavage before depletion and then multiplying by 100. The graph shows the summary of 9 independent experiments with a total of 13 WT mice. The data are represented as the mean  $\pm$  SEM. *P* values were determined by paired Student's *t*-test. \*\*\**P* < 0.001.

# Supplementary Figure 3

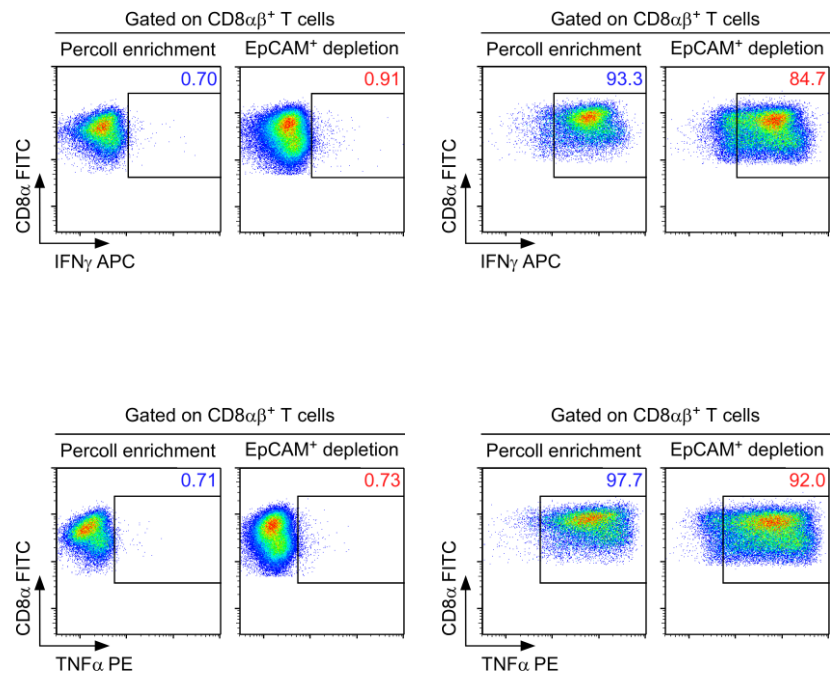

**Suppl. Fig. 3 Comparison of IELs isolated by Percoll gradients and EpCAM<sup>+</sup> depletion**  
Intracellular staining of IFN $\gamma$  (top) and TNF $\alpha$  (bottom) in CD8 $\alpha\beta^+$  T cells that were isolated from SI epithelial tissues by either Percoll enrichment or EpCAM<sup>+</sup> depletion and then TCR stimulated for 5 days *in vitro*. Contour plots show cytokine expression before (left) or after (right) stimulation with PMA and ionomycin for 4 hours. The results are representative of 2 independent experiments with a total of 4 WT mice.

# Supplementary Figure 4

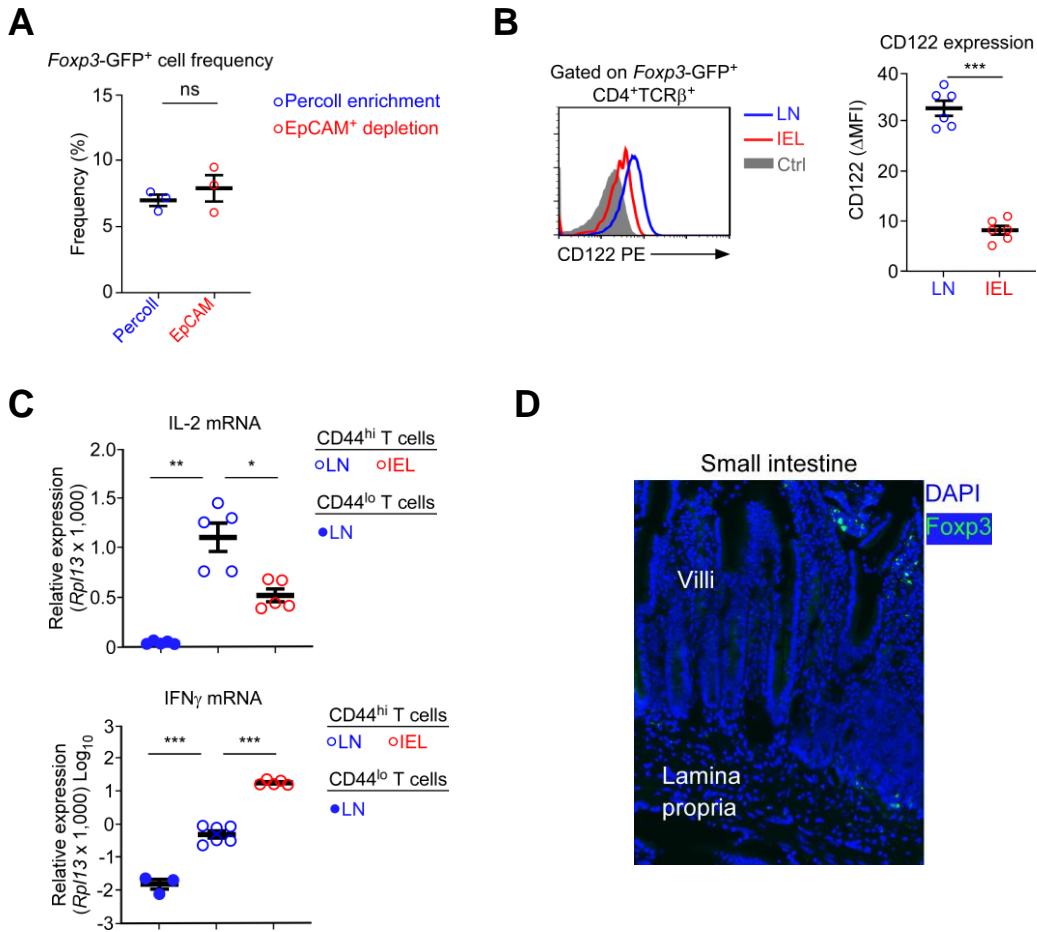

## Suppl. Fig. 4 Phenotypic analysis of SI IEL *Foxp3*<sup>+</sup> Treg cells

**A.** Frequencies of *Foxp3*-GFP<sup>+</sup> T cells among CD45<sup>+</sup> IELs that were isolated either by Percoll enrichment or EpCAM<sup>+</sup> depletion. Graphs show the summary of 2 independent experiments with a total of 4 *Foxp3*-GFP reporter mice.

**B.** Histogram shows CD122 expression on *Foxp3*-GFP<sup>+</sup>CD4<sup>+</sup>TCRβ<sup>+</sup> cells of LN and IELs. Graph shows ΔMFI of surface CD122 expression. Histogram is representative and the graph is the summary of 2 independent experiments with a total of 6 *Foxp3*-GFP reporter mice.

**C.** Quantitative RT-PCR analysis of IL-2 and IFN $\gamma$  mRNA expression in CD44<sup>hi</sup> T cells from LN and IEL or from CD44<sup>lo</sup> LN T cells. The relative abundance of cytokine mRNA was normalized to control *Rpl13* mRNA. The graphs show the summary of 2 independent experiments with a total of 3-6 WT mice.

**D.** Confocal microscopic image of *Foxp3*<sup>+</sup> cells (green) in the small intestine epithelium. *Foxp3*<sup>+</sup> Treg cells were identified with anti-*Foxp3* antibodies followed by fluorescence-conjugated secondary antibodies, and the tissue sections were counterstained with DAPI (blue).

Data are represented as mean  $\pm$  SEM. *P* values were determined by paired Student's *t*-test (A and B) or one-way ANOVA with Tukey's multiple comparison test (C). \*, *P* < 0.05; \*\*, *P* < 0.01; \*\*\*, *P* < 0.001; ns, non-significant.

# Supplementary Figure 5

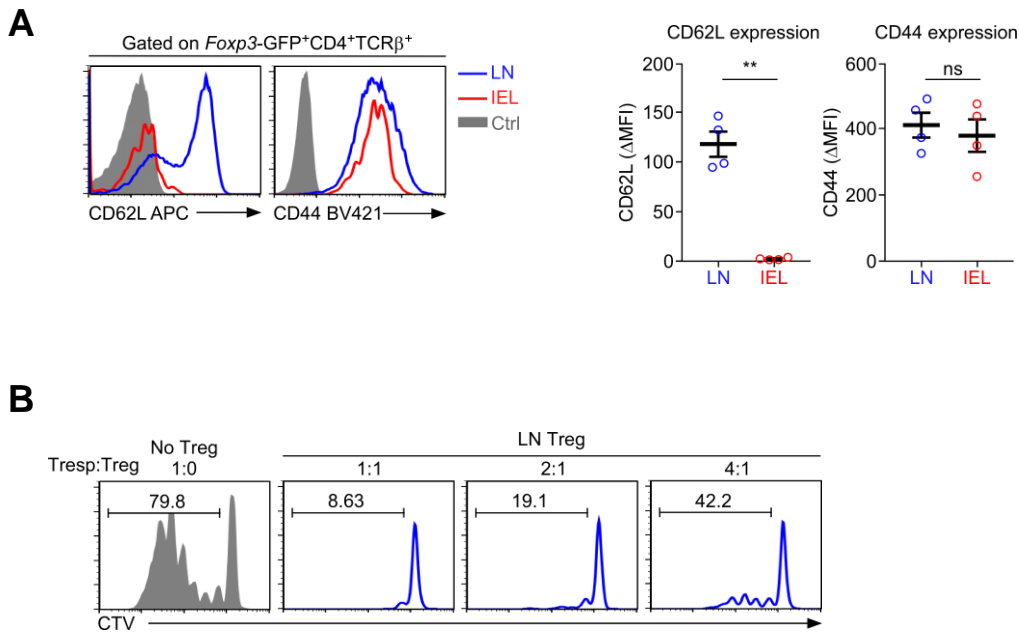

## Suppl. Fig. 5 Functional analysis of *Foxp3*<sup>+</sup> Treg cells among SI IELs

**A.** Histograms show CD62L and CD44 expression on *Foxp3*-GFP<sup>+</sup>CD4<sup>+</sup>TCRβ<sup>+</sup> cells of LN and IELs (left). Graphs show the ΔMFI of CD62L and CD44 expression (right). Histograms are representative and the graphs show a summary from 2 independent experiments with a total of 4 *Foxp3*-GFP reporter mice.

**B.** Suppression assay using LN Tregs isolated from *Foxp3*-GFP reporter mice. Tresp proliferation was assessed after 5 days of culture with different ratios of Tregs cells. The data are represented as mean ± SEM. *P* values were determined by paired Student's *t*-test. \*\*, *P*<0.01; and ns; non-significant.

# Supplementary Figure 6

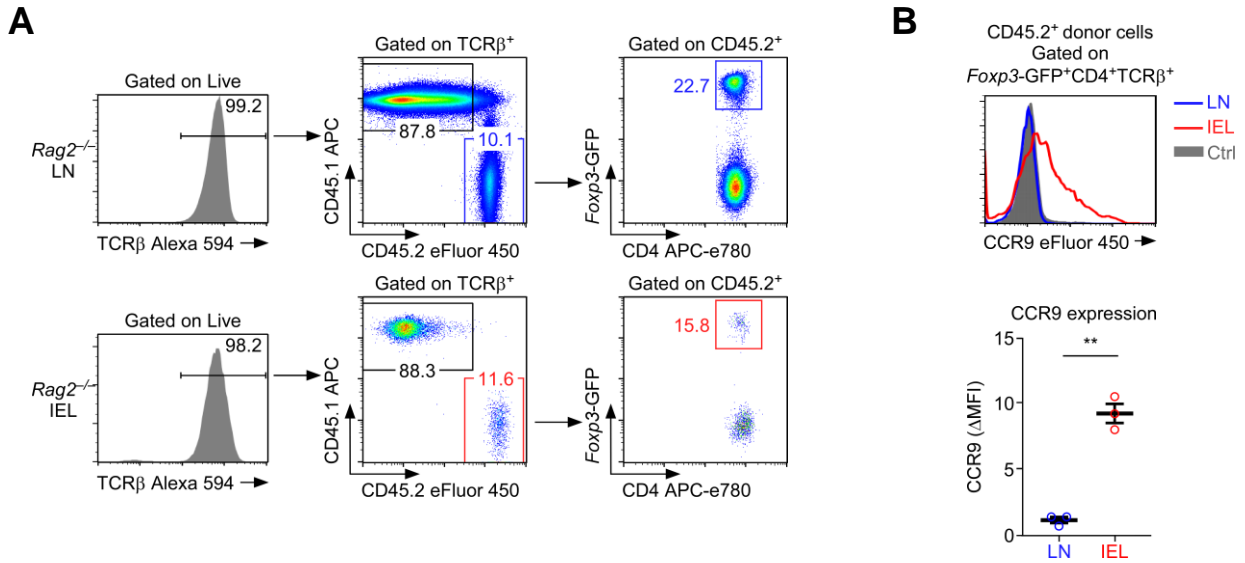

## Suppl. Fig.6 Adoptive transfer and analysis of iTreg cells

**A.** Identification of donor iTreg cells in LN and IEL of *Rag2*<sup>-/-</sup> mice. Live donor cells were gated for TCRβ<sup>+</sup> cells (left) followed by congenic markers CD45.1 and CD45.2 (middle). CD45.2<sup>+</sup> iTreg were identified by *Fcpx3*-GFP expression in CD4<sup>+</sup> cells (right) and further analyzed. Results are representative of 3 independent experiments with a total of 3 *Rag2*<sup>-/-</sup> mice.

**B.** Surface staining for CCR9 in *Fcpx3*-GFP<sup>+</sup>CD4<sup>+</sup>TCRβ<sup>+</sup> donor T cells from LN and IELs of *Rag2*<sup>-/-</sup> recipient mice. The histogram is representative, and the graph shows the summary of 3 adoptive transfer experiments. The data are represented as mean ± SEM. *P* values were determined by paired Student's *t*-test. \*\*, *P* < 0.01.

# Supplementary Methods

## *Quantitative RT-PCR.*

Total RNA was isolated from sorted cells with RNeasy Mini kit (Qiagen). RNA was reverse transcribed into cDNA by oligo(dT) priming with the QuantiTect Reverse Transcription kit (Qiagen). A QuantStudio 6 Flex Sequence Detection System and the QuantiTect SYBR Green detection system (Qiagen) were used for quantitative RT-PCR. Primers sequences are as follows. IL-2 (forward, 5'-CCGCTCCCCTCCGATTA-3', and reverse, 5'-GCACCAAGAAGGTGCCA-3'), IFN $\gamma$  (forward, 5'-CAGCAACAGCAAGGCGAAAAAGG-3', and reverse, 5'-TTTCCGCTT CCTGAGGCTGGAT-3') and Rpl13 (forward, 5'-CGAGGCATGCTGCCCCAC AA-3', and reverse, 5'-AGCAGGGACCACCATCCGCT-3').

## *Immunofluorescence microscopy*

Mouse small intestine tissues were collected, washed, and opened longitudinally. The tissues were embedded in Tissue-Tek O.C.T. compound (SAKURA Finetechnical Company) in cryomolds, and snap frozen in liquid nitrogen for cryosectioning. Cryosections were prepared on a Leica Cryostat (Leica Microsystems) at  $-21^{\circ}\text{C}$  in 5  $\mu\text{m}$  thickness. Sections were mounted on glass slides and fixed in 100% ethanol at  $4^{\circ}\text{C}$  for 30 min followed by 3 min of  $-20^{\circ}\text{C}$  acetone fixation at room temperature. The tissue sections were blocked in 5% donkey serum (Jackson laboratory) and 1% TritonX-100 in PBS. The monoclonal antibody anti-Foxp3 (Life Technologies) and Alexa 488 conjugated donkey anti-rat secondary antibody (Life Technologies) were used to detect Foxp3 location and DAPI was used to stain nucleus.
